1  
2  
3  
4  
5  
6  
7  
8  
9  
10  
11  
12  
13  
14  
15  
16  
17  
18

**Title: External and Internal Signal-to-noise Ratios Alter Timing and Location of Cortical Activities During Speech-in-noise Perception**

Abbreviated title: Neural correlates of speech-in-noise performance

**Subong Kim,<sup>1, #</sup> Adam T. Schwalje,<sup>2, #</sup> Andrew S. Liu,<sup>2</sup> Phillip E. Gander,<sup>3</sup> Bob McMurray,<sup>1,2,4</sup> Timothy D. Griffiths,<sup>5</sup> and Inyong Choi<sup>1, 2, \*</sup>**

<sup>1</sup> Department of Communication Sciences and Disorders, University of Iowa, Iowa City, IA 52242, USA

<sup>2</sup> Department of Otolaryngology – Head and Neck Surgery, University of Iowa Hospitals and Clinics, Iowa City, IA 52242, USA

<sup>3</sup> Department of Neurosurgery, University of Iowa Hospitals and Clinics, Iowa City, IA 52242, USA

<sup>4</sup> Department of Psychological and Brain Sciences, University of Iowa, Iowa City, IA 52242, USA

<sup>5</sup> Institute of Neuroscience, Newcastle University, Newcastle upon Tyne, NE1 7RU, UK

# SK and ATS contributed equally to this work.

\* Corresponding author at: Department of Communication Sciences and Disorders, University of Iowa, 250 Hawkins Dr., Iowa City, IA 52242, USA. Email address: [inyong-choi@uiowa.edu](mailto:inyong-choi@uiowa.edu)

Number of pages: 34

Number of figures: 6

Number of words: 238 (abstract), 1185 (introduction), and 1862 words (discussion)

**Author contributions:**

S.K. and A.T.S. contributed equally to this work. I.C. designed the experiments. S.K. ran the experiments. S.K., A.T.S., A.S.L., P.E.G., B.M., T.D.G., and I.C. analyzed and interpreted data.

26 S.K., A.T.S., and I.C. prepared the manuscript, with revisions and suggestions from A.S.L.,

27 P.E.G., B.M., and T.D.G..

28

29 **Acknowledgments**

30 This work was supported by Hearing Health Foundation Emerging Research Grant and

31 departmental start-up awarded to Inyong Choi, and NIH T32 (5T32DC000040-24) and NIDCD

32 P50 (DC000242 31A1) awarded to Bruce Gantz. The authors declare no competing financial

33 interests.

34

35

## 36 **Abstract**

37 Understanding speech in noise (SiN) is a complex task that recruits multiple cortical  
38 subsystems. There is a variance in individuals' ability to understand SiN that cannot be  
39 explained by simple hearing profiles, which suggests that central factors may underlie the  
40 variance in SiN ability. Characterizing central functions that exhibit individual differences during  
41 a SiN task and finding their relative contributions to predicting SiN performance can reveal key  
42 neural mechanisms of SiN understanding. Here, we elucidated a few cortical functions involved  
43 during a SiN task and their hierarchical relationship using both within- and across-subject  
44 approaches. Through our within-subject analysis of source-localized electroencephalography,  
45 we demonstrated how acoustic signal-to-noise ratio (SNR) alters neural activities along the  
46 auditory-motor pathway, or dorsal stream, of speech perception. In quieter noise, left  
47 supramarginal gyrus (SMG, BA40) exhibited dominant activity at an early timing (~300 ms after  
48 word onset). In contrast, in louder noise, left inferior frontal gyrus (IFG, BA44) showed dominant  
49 activity at a later timing (~700 ms). Further, through an individual differences approach, we  
50 showed that listeners show different neural sensitivity to the background noise and target  
51 speech, reflected in the amplitude ratio of cortical responses to speech and noise, named as an  
52 "internal SNR." We found the "softer noise" pattern of activity in listeners with better internal  
53 SNR, who also performed better. This result implies that how well a listener "unmask" target  
54 speech from noise determines the subsequent speech analysis and SiN performance.

55

## 56 **Significance**

57 This study elucidated crucial cortical mechanisms underlying speech-in-noise perception using  
58 both within- and across-subject design approaches. We found that cortical auditory evoked  
59 responses to speech involved early activation in the temporo-parietal cortex in an easy condition  
60 while a hard condition cortical activity involved late activation in the frontal cortex. Importantly,  
61 the across-subject analysis showed that pre-speech time cortical activity predicts post-speech

62 time activity, in such a way that good performers with better neural suppression of background  
63 noise show cortical activity similar to the pattern observed in the easier condition regardless of  
64 given acoustic noise level. This suggests a critical role of pre-lexical sensory gain control  
65 processes affecting performance and cognitive load during speech-in-noise perception.

## 66 **Introduction**

67 Understanding speech in noise (SiN) is essential for communication in social settings.  
68 Yet young normal-hearing listeners are remarkably good at this: even in challenging SiN  
69 conditions where the speech and noise have the same intensity (i.e., 0 dB signal-to-noise ratio:  
70 SNR) and overlapped frequency components, they often recognize nearly 90% of sentences  
71 correctly (Ohlenforst et al., 2017). This suggests a remarkable capacity of the auditory system to  
72 cope with noise. However, the ability to understand SiN degrades severely with increased  
73 background noise level (Ohlenforst et al., 2017), hearing loss (Harris and Swenson, 1990),  
74 and/or aging (Nabelek, 1988). Moreover, recent studies show that normal hearing listeners  
75 show large individual differences in SiN performance (Lieberman et al., 2016). By linking this  
76 variable ability for SiN perception to cortical activity, we may be able to understand the neural  
77 mechanisms by which humans accomplish this ability, and this may shape our understanding of  
78 how best to remediate hearing loss.

79 Different neuro-cognitive mechanisms might give rise to better or worse SiN  
80 performance. First, listeners may vary in the mechanisms for representing sound in the  
81 ascending pathway to the auditory cortex (AC) and in auditory scene analysis (Bregman, 1999),  
82 both of which are required to separate signal from noise. Auditory scene analysis processes can  
83 inhibit neural responses to task-irrelevant sensory inputs even before the target sound is heard,  
84 based on expectations of differences between the target and masker such as differences in their  
85 spectra (Lee et al., 2013), location (Frey et al., 2014; Goldberg et al., 2014), and timing (Lange,  
86 2009). A successful auditory scene analysis during a SiN task will unmask the target speech  
87 from maskers, which will enhance effective signal-to-noise ratio (SNR) in the neural pathway.  
88 Second, listeners might vary in neural mechanisms for representing speech in the temporo-  
89 parietal-frontal language network that might compensate for a noisy signal. Current models of  
90 the neural processing of speech suggest two distinct cortical networks (i.e., dorsal and ventral  
91 stream) for speech processing (Scott and Johnsrude, 2003; Hickok and Poeppel, 2007; Myers

92 et al., 2009; Gow, 2012). Such a division of labor is highlighted by work showing that speech in  
93 noise engages the dorsal stream more strongly than in quiet (Hickok and Poeppel, 2007;  
94 Liebenthal et al., 2013; Bidelman and Howell, 2016; Du et al., 2016). However, we have limited  
95 knowledge of the functional roles of these two cortical pathways, their timing, and their  
96 hierarchical relation.

97       Signal separation and compensatory mechanisms can be distinguished by using  
98 functional neuroimaging in an individual differences approach. That is, we can compare the  
99 degree to which accuracy in a SiN task is correlated to either pattern of activity in auditory and  
100 related (signal analysis), or with frontal areas involving articulation and decision making  
101 (compensation)<sup>1</sup>. A few have studies asked how individual differences in cortical pathways  
102 correlate with SiN performance. These suggest activity in frontal areas (e.g., inferior frontal  
103 gyrus: IFG) predict SiNs performance (Wong et al., 2009; Bidelman and Howell, 2016; Du et al.,  
104 2016). They largely did not find an influence of lower-level areas; however, as we discuss,  
105 methodological limits may have prevented this. Importantly, no work has examined both dorsal  
106 and ventral processes simultaneously to determine if signal separation or compensatory speech  
107 pathways capture unique variance in performance. Our central hypothesis is that the quality of  
108 early signal analysis that occurs before auditory-motor transformations, rather than variation in  
109 later compensatory processes dependent on the dorsal pathway, uniquely predicts speech  
110 perception accuracy.

111       A secondary test of the importance of each pathway is the relative timing of activity in  
112 these pathways during speech processing. Functionally, work using eye-movements in the

---

<sup>1</sup> A third possible mechanism—differences in auditory attention—likely spans both networks. Auditory attention likely originates in a fronto-parietal network involving the inferior frontal gyrus (IFG), the superior parietal sulcus, and the intraparietal sulcus (Teki et al., 2011; Hausfeld et al., 2018), but affects early-stage auditory activity (Choi et al., 2013; Choi et al., 2014; Bressler et al., 2017). Under an attentional account, if the most variance amongst listeners is due to differences in deploying attention, we should see SiN performance primarily correlated with frontal activity; whereas if most variance is due to using attention to clean up the signal it should primarily be associated with the auditory and related cortex.

113 visual world paradigm has extensively characterized the time course of word recognition in both  
114 quiet (Allopenna et al., 1998; Dahan and Gareth Gaskell, 2007; Magnuson et al., 2007) and  
115 under challenging conditions such as noise or signal degradation (Huettig and Altmann, 2005;  
116 Ben-David et al., 2011; McQueen and Huettig, 2012; Brouwer and Bradlow, 2016; McMurray et  
117 al., 2017). In general, this work suggests that in quiet, listeners activate a range of lexical  
118 candidates immediately at the onset of the auditory stimulus. This *lexical competition* resolves  
119 rapidly by around 250 ms after the uniqueness point of the word. A moderate amount of  
120 degradation or noise typically imposes about a 75-100 ms delay on this recognition process  
121 (Ben-David et al., 2011; Farris-Trimble et al., 2014), where severe degradation can delay lexical  
122 access by up to 250 ms (Farris-Trimble et al., 2014; McMurray et al., 2017). This is particularly  
123 relevant for evaluating the causal role of downstream compensatory processes – if such  
124 processes are later than 400-500 ms, this may be too late to reflect lexical competition.  
125 However, the timing of cortical activity within each pathway is largely unknown, as most of the  
126 work on speech in noise perception has been conducted with functional magnetic resonance  
127 imaging (fMRI) (Wong et al., 2008; Wong et al., 2009; Du et al., 2014, 2016) which has the poor  
128 temporal resolution.

129         Assuming that left supramarginal gyrus (SMG: the anterior part of the inferior parietal  
130 lobule) is an early stage in the dorsal pathway works as an interface between  
131 auditory/phonological representations in the superior temporal gyrus and motor ones in the  
132 frontal lobe (Binder et al., 2004; Gow, 2012), we expect to see early SMG activity in the less  
133 adverse listening situation. In contrast, we hypothesize that noisier listening conditions will  
134 evoke late activities in the frontal area, reflecting downstream compensatory processes.

135         The present study tests above hypotheses using both a within-subject design and  
136 individual differences approaches. First, we identify how both primary auditory pathways and  
137 frontal compensatory processes differ in noise. This within-subject design examined the effect of  
138 acoustic SNR on the a) timing and b) location of cortical activity during word-in-noise

139 recognition. For this, we used two distinct high-density electroencephalographic (EEG)  
140 analyses: 1) Hypothesis-driven source estimation that examined time courses of evoked  
141 responses within two regions-of interest (ROIs) – SMG and IFG; and 2) sensor-space  
142 microstate analysis as a data-driven approach that cross-validates the ROI-based analysis.  
143 Next, we assessed the relative and unique contributions of both primary and compensatory  
144 cortical processes in predicting SiN performance. We use the same EEG data to quantify an  
145 individual's speech unmasking ability by computing the ratio of cortical evoked responses to  
146 noise- and target speech-onset, or “internal SNR.” We also quantify post-speech-time neural  
147 activity in the dorsal speech-motor pathway. These were then used in a regression analysis to  
148 determine the relative contribution of each to SiN performance.

149

150

## Materials and Methods

### 151 *Participants*

152 All study procedures were reviewed and approved by the local Institutional Review  
153 Board. Thirty subjects between 19 and 31 years of age (mean = 22.4 years, SD = 2.8 years;  
154 median = 22 years; 9 (30%) male) were recruited from a population of students at a large  
155 Midwestern university. All subjects were native speakers of American English, with normal  
156 hearing thresholds no worse than 20 dB HL at any frequency, tested in octaves from 250 to  
157 8000 Hz. Four subjects (1 male) were excluded from the analysis due to signal contamination  
158 across several EEG channels.

159

### 160 *Task design and procedures*

161 We simultaneously measured behavioral performance and cortical neural activity a short  
162 (15 minute) experimental sessions.

163 Each trial (**Figure 1**) began with the presentation of a fixation cross ('+') on the screen.

164 Listeners were asked to fix their gaze on this throughout the trial to minimize eye-movement



165 artifacts. Next, they heard the cue phrase “check the word.” This enabled listeners to predict the  
166 timing of next acoustic event (the noise onset). After fixed-duration (700 ms) silence that  
167 followed the cue phrase, multi-talker babble noise started and continued for 2 seconds. One  
168 second after the noise onset, the target word was heard 100 ms after the composite auditory  
169 stimulus (noise + word) offset, four written choices appeared on the screen. The response  
170 options differed either in the initial or the final consonant (e.g., ‘than,’ ‘van,’ ‘ban,’ and ‘pan,’ for  
171 target word ‘ban’; ‘hit,’ ‘hip,’ ‘hiss,’ ‘hitch’ for target word ‘hiss’). Subjects pressed a button on a  
172 keypad to indicate their choice. No feedback was given to the subject at the end of a trial. The  
173 next trial began 1 second after the button press. This trial structure was intended to minimize  
174 visual, pre-motor, and motor artifacts during the time of interest surrounding the auditory stimuli.  
175 The timing and intervals of auditory stimuli (i.e., cue phrase, noise, and target) were intended to  
176 derive well-distinct cortical evoked responses to the onsets of background noise and target  
177 word.

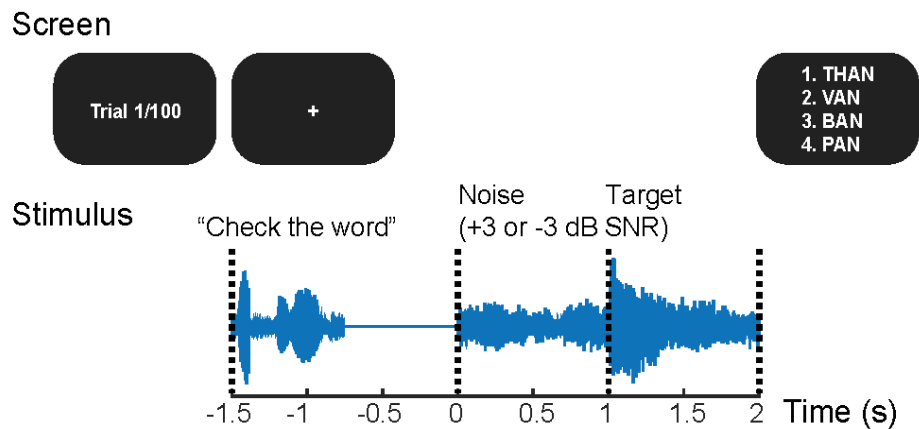

178 **Figure 1.** Trial and stimulus structure. Every trial starts with the cue phrase “check the word.” A target  
179 word starts 1 second after the noise onset. Four choices are given after the word ends; subjects select  
180 the correct answer with a keypad. No feedback is given. The noise level is manipulated to create high  
181 (+3 dB) and low (-3 dB) SNR conditions. Subjects complete 50 trials for each condition.

179 Since we are particularly interested in SMG/IFG regions that are involved in  
180 phonological/lexical processing (Hickok and Poeppel, 2007), we elected to use natural  
181 monosyllabic words, rather than simpler non-sense speech tokens used by prior studies

182 (Parbery-Clark et al., 2009; Bidelman and Howell, 2016). This engaged lexical processing,  
183 placed high demands on cortical processing, and maximized ecological validity (Gagne et al.,  
184 2017). Thus, target words consisted of 100 hundred CVC words from the California Consonant  
185 Test (CCT) (Owens and Schubert, 1977), spoken by a male speaker with a General American  
186 accent.

187 The RMS level of noise was either 68 and 62 dB SPL, and target word was always  
188 presented at 65 dB SPL. This led to either +3 or -3dB SNR (referred to as “high SNR” and “low  
189 SNR,” respectively). Fifty words were presented at each SNR ( $\pm 3$  dB). -3 dB SNR was chosen  
190 to emulate a highly effortful listening condition yielding ~70% accuracy from pilot experiments.  
191 +3 dB SNR condition emulates an easy listening condition.

192 The task was implemented using the Psychtoolbox 3 package (Brainard, 1997; Pelli,  
193 1997) for Matlab (R2016b, The Mathworks). Participants were tested a sound-treated,  
194 electrically shielded booth with a single loudspeaker (model #LOFT40, JBL) positioned at a 0°  
195 azimuth angle at a distance of 1.2 m. A computer monitor was located 0.5m in front of the  
196 subject at eye level. The auditory stimuli were presented at the same levels for all subjects.

197

### 198 ***EEG acquisition and preprocessing***

199 Scalp electrical activity (EEG) was recorded during the SiN task using the BioSemi  
200 ActiveTwo system at a 2048 Hz sampling rate. Sixty-four active electrodes were placed  
201 according to the international 10-20 configuration. Trigger signals were sent from Matlab  
202 (R2016b, The Mathworks) to the ActiView acquisition software (BioSemi). The recorded EEG  
203 data from each channel were bandpass filtered from 1 to 50 Hz using a 2048-point FIR filter.  
204 Epochs were extracted from -500 ms to 3 s relative to stimulus onset. After baseline correction  
205 using the average voltage between -200 and 0 ms, epochs were down-sampled to 256 Hz.

206 Since we were interested in the speech-evoked responses from frontal brain regions, we  
207 opted for a non-modifying approach to eye blink rejection: Trials that were contaminated by an

208 eye blink artifact were rejected based on the voltage value of the Fp1 electrode (bandpass  
209 filtered between 1 and 20 Hz). Rejection thresholds for eye blink artifacts were chosen  
210 individually for each subject, and separately for the noise and target word periods. After  
211 rejecting bad trials, grand averages for each electrode were calculated for the two conditions.  
212 For analysis of speech-evoked responses, we repeated baseline correction using the average  
213 signal in the 300 ms preceding the word onset.

214

### 215 **Source analysis**

216 The source-space analysis was based on minimum norm estimation (Gramfort et al.,  
217 2013; Gramfort et al., 2014) as a form of multiple sparse priors (Friston et al., 2008). After co-  
218 registration of average electrode positions to the reconstructed average head model MRI, the  
219 forward solution (a linear operator that transforms source-space signals to sensor space) was  
220 computed using a single-compartment boundary-element model (Hämäläinen, 1989). The  
221 cortical current distribution was estimated assuming that the orientation of the source is  
222 perpendicular to the cortical mesh. Cross-channel EEG-noise covariance, computed for each  
223 subject, was used to calculate the inverse operators. A noise-normalization procedure was used  
224 to obtain dynamic statistical parametric maps (dSPMs) as z-scores (Dale et al., 2000). The  
225 inverse solution estimated the source-space time courses of event-related activity at each of  
226 10,242 cortical voxels per hemisphere. In the present study, two predetermined ROIs will be  
227 included: (1) bilateral SMG, and (2) bilateral pars opercularis and pars triangularis of IFG. The  
228 SMG is an early stage in the dorsal pathway and, among its many roles, works as an interface  
229 between auditory/phonological representations in the superior temporal gyrus and motor ones in  
230 frontal lobe including precentral/postcentral and IFG (Binder et al., 2004; Gow, 2012). To ensure  
231 the fidelity of source localization at our ROIs, we applied the same analysis to HG, which  
232 expected to be active in auditory tasks, before running ROI-based source analysis explained  
233 below (**supplement Figure 1**).

234

235 **Statistical analyses**

236 **ROI-based source analysis.** For ROI-based source analysis, one-sample *t*-tests were  
237 used to compare the distributions of mean source event-related potential (ERP) to zero  
238 (baseline voltage) in each SNR condition. The *t*-value envelope was then computed (as a form  
239 of smoothing). This was done by applying a bandpass filter, then calculating the absolute value  
240 of the Hilbert transform. The bandpass filter was set to one of two center frequencies,  
241 depending on the specific ROIs. Because the neural oscillations evoked by early ERP  
242 components such as N1-P2 have peak latencies of about 100 ms at their half cycle  
243 (approximately 5 Hz), and late ERP components such as N2-P3 have latencies of about 200 ms  
244 at their half cycle (approximately 2.5 Hz), the bandpass filter was set to between either 3 to 7 or  
245 1 to 5 Hz to highlight these components. The *t*-value envelope calculated using the bandpass  
246 filter between 3 to 7 Hz was used to investigate HG and SMG ROIs, and earlier times of  
247 interest, while the envelope using the 1 – 5 Hz filter was used for IFG ROI and later times of  
248 interest. For each SNR condition, the whole brain *t*-value envelope time courses were obtained.

249 Since we did not have individual structural MRI head models, it was not ideal to take the  
250 summed activity (mean or median) for all the voxels within ROIs. This is because individual  
251 difference in functional and anatomical structure of the brain may result in spatial blurring since  
252 current densities across adjacent voxels can overlap each other. Instead, representative voxels  
253 were identified for each ROI, for each SNR condition. We used a combination of previously-  
254 described methods to select voxels of interest that were used in fMRI studies (Tong et al.,  
255 2016). The cross-correlation coefficients for *t*-value envelopes between all voxels in an ROI  
256 were calculated across time (up to 800 ms after the target word onset), and then the mean  
257 coefficient was calculated for each voxel. The most representative voxel was defined as having  
258 the maximum value mean coefficient, while also being above threshold at two or more

259 continuous timepoints based on voxel's  $p$  value, as determined using one-sample  $t$ -tests (Tong  
260 et al., 2016).

261         Once the most representative voxel was chosen for each SNR condition, a leave-one-  
262 out procedure (i.e., Jackknife approach) was used to compare the population means between  
263 the two SNR conditions, at those voxels, using paired  $t$ -tests. Prior to computing  $p$ -values,  $t$ -  
264 statistics were adjusted for jackknifing (Luck, 2014). The positive false discovery rate (pFDR)  
265 was estimated from those  $p$ -values after downsampling the time sequence according to Nyquist  
266 theorem, and used to find timepoints that showed significant difference between SNR conditions  
267 (Storey, 2002). Finally, the whole cortical surface source space was evaluated at those  
268 timepoints.

269

270         **Microstate analyses.** Microstate analysis was conducted to cross-validate our ROI-  
271 based analyses that assess effect of external SNR on ERPs at the group level. Microstates  
272 describe transient, quasi-stable topographic orientations which provide information about the  
273 timing of cognitive processes (Koenig et al., 2014). Microstates have been used to characterize  
274 both resting state and event-related EEG activity (Ott et al., 2011; Schiller et al., 2016). The  
275 microstate analysis was conducted on grand mean data (averaged across all subjects),  
276 separately in each SNR condition and were implemented in the RAGU program (Koenig et al.,  
277 2011; Koenig et al., 2014).

278         To conduct this analysis, we first identified four microstate cluster maps based on spatial  
279 clustering of ERP topographies. To this, a  $k$ -means algorithm was used for microstate  
280 identification with ten random re-initializations. As a cross-validation procedure, the 26 subjects  
281 were randomly split 50 times into a training set and a test set, each comprising 13 subjects.  
282 Next, the grand mean voltages at each timepoint of each SNR condition were assigned to the  
283 best fit cluster map (Koenig et al., 2011; Koenig et al., 2014). To do this, each timepoint of the

284 ERP was assigned to the specific microstate cluster map that had the highest correlation  
285 coefficients with the topography of the ERP, across all electrodes, at that timepoint.

286 To assess how well the grand mean ERPs were explained by the different microstate  
287 clusters, we calculated the relative area of global field power (GFP) for each cluster, after  
288 assigning the timepoints to microstates. The GFP at time  $t$  is equal to the standard deviation of  
289 the signal at all  $N$  electrodes, which is defined as

$$290 \quad (1) \text{ GFP}(t) = \sqrt{\frac{\sum_{i=1}^N (v_i(t) - \bar{v}(t))^2}{N}},$$

291 where  $v_i(t)$  is the voltage at electrode  $i$ , and  $\bar{v}(t)$  is the average voltage across all electrodes at  
292 time  $t$ .

293 After identification of the microstate explaining the most variance for grand average ERP  
294 in each SNR condition, the timepoints of maximum GFP for that microstate were used to create  
295 whole brain maps showing cortical source activity. The  $t$ -value envelope calculated by one-  
296 sample t-tests in each SNR condition was used to investigate the source activity at early  
297 timepoints (about up to 400 ms after the word onset) using the bandpass filter between 3 to 7  
298 Hz, and the source activity at later timepoints (about after 400 ms) using the 1 – 5 Hz filter.

299  
300 **Regression approaches.** To conduct multiple linear regressions, we used a jackknifing  
301 approach (Stahl and Gibbons, 2004; Luck, 2014). In this approach the relevant neural factors  
302 were computed for all subjects but one. This was repeated leaving out each subject in turn, and  
303 the resulting data submitted to a linear regression with SiN performance (accuracy) as the  
304 dependent variable, and SMG/IFG activation, and internal SNR as the predictor variables. Test  
305 statistics were then adjusted to account for the fact that each data-point represents N-1  
306 participants.

307 Correlation/regression analyses used these techniques to simultaneously examine  
308 bottom-up and compensatory related SiN performance to three factors. Our first, analysis

309 examined raw cortical evoked activity to the target and noise. To best represent bilateral  
310 auditory cortical activity, we used sensor-space ERP envelopes using the 3 – 7 Hz bandpass  
311 filter from channel Cz at around 200 ms after the noise onset and at about 200 ms after the  
312 target word onset, based on the timing determined by microstate analysis. Then, “internal SNR”  
313 was defined as the ratio of target word-evoked ERP envelope peaks to noise-evoked ERP  
314 envelope peaks magnitude described above, in dB scale, obtained from channel Cz (Equation  
315 3). The internal SNR is different for each subject, and is separate from the fixed external, or  
316 acoustic, SNR (here,  $\pm 3$  dB).

$$317 \quad (2) \text{ Internal SNR} = 20 \log_{10} \frac{\text{Word evoked potential}}{\text{Noise evoked potential}}$$

318 Second, to examine dorsal regions, we used cortical regions that were previously  
319 identified in the ROI-based source analysis described above. The peak magnitudes of the  $t$ -  
320 value envelopes were obtained for early SMG activation in the high SNR condition and late IFG  
321 activation in the low SNR condition.

322

323

## Results

### 324 *SiN performance*

325 There was a large variance in performance among participants. This was observed in  
326 both the high SNR condition (mean accuracy = 80.64%, SD = 7.81%, median = 83.01%; mean  
327 reaction time = 1.53 s, SD = 0.32 s, median = 1.55 s) and the low SNR condition (mean  
328 accuracy = 68.21%, SD = 8.92%, median = 70.37%; mean reaction time = 1.70 s, SD = 0.36 s,  
329 median = 1.69 s). Both accuracy ( $t(25) = 6.99$ ,  $p < 0.001$ , paired t-test) and reaction time ( $t(25) =$   
330  $-3.81$ ,  $p < 0.001$ , paired t-test) differed significantly between the two SNR conditions (**Figure**  
331 **2A**). Reaction time and accuracy were correlated in the high SNR condition (**Figure 2B**,  
332 Pearson correlation  $r = -0.50$ ,  $p = 0.009$ ), but not in the low SNR condition (**Figure 2C**,  $r = -0.19$ ,

333  $p = 0.34$ ). As a whole, these results validate that the SNR manipulation was sufficient to create  
334 more challenging speech perception conditions.  
335

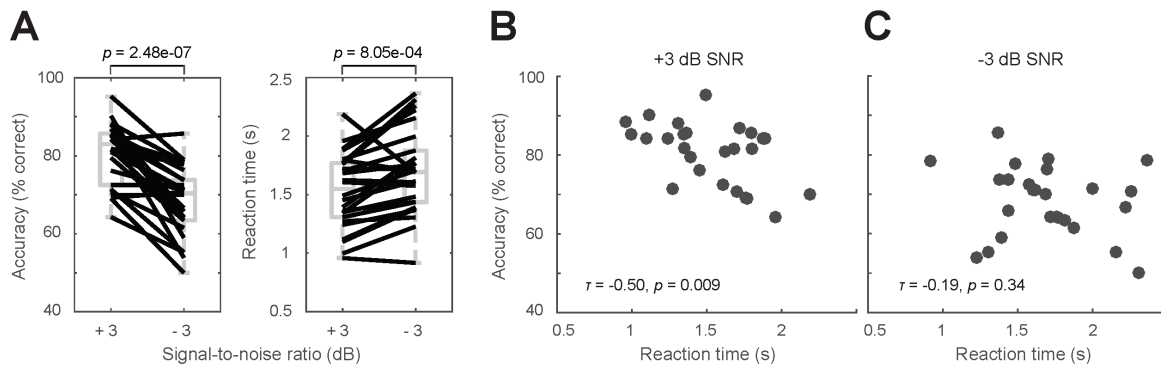

**Figure 2.** Behavioral results. **A.** Summary of behavioral performance for the two conditions (+3 and -3 dB SNR). Boxes denote the 25<sup>th</sup> – 75<sup>th</sup> percentile range; the horizontal bars in the center denote the median; the ranges are indicated by vertical dashed lines. Solid lines connect points for the same subject in different conditions. **B.** Average accuracy as a function of reaction time in +3 dB SNR condition. **C.** Average accuracy and reaction time in -3 dB SNR condition.

### 336 **The effect of SNR on cortical activity**

337 To assess the cortical activity, we converted sensor-space EEG signals to whole brain  
338 source-activity. This allowed us to localize the effects of noise on targeted ROIs at specific  
339 times. Within left hemisphere SMG, the high SNR condition showed significantly greater activity  
340 than the low SNR condition from 200 to 330 ms (FDR adjusted  $p < 0.05$ ) (**Figure 3B left**).  
341 Within left hemisphere IFG, the low SNR condition showed significantly greater activity than the  
342 high SNR condition from 740 to 830 ms (FDR adjusted  $p < 0.05$ ) (**Figure 3B right**), throughout  
343 triangular and opercula regions.



344 A visual representation of this finding can be seen in **Figure 3C**. Here, *t*-values reveal  
345 significant differences between high and low SNR conditions. The timepoints were chosen for  
346 display where the greatest number of voxels have significant differences. We observed  
347 increased amplitude of the left hemisphere SMG activation in the high SNR condition at around  
348 250 ms (*t*-value envelope). This may indicate efficient lexical processing in a relatively favorable  
349 listening condition. However, in the low SNR condition, the peak amplitude of the left  
350 hemisphere IFG activation (*t*-value envelope) seen around 700 ms after word onset. Given most  
351 target words were around 500 ms in duration, SMG was primarily activated during the  
352 presentation of the target word, while IFG was activated after its offset.

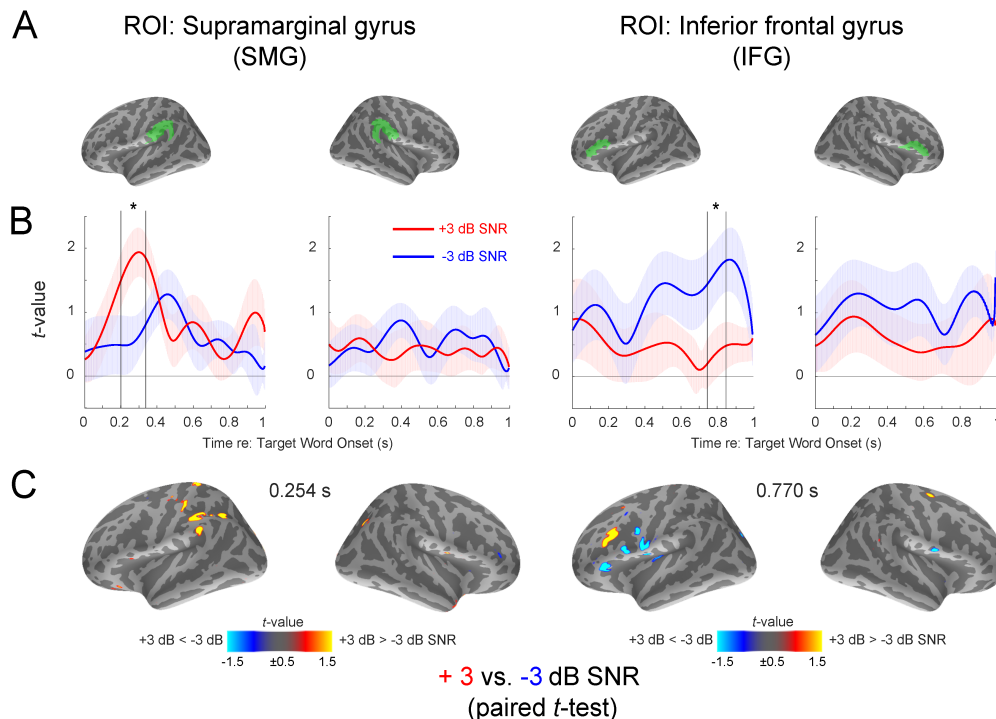

**Figure 3.** Region-of-interest (ROI) based source analysis. **A.** Cortical labels for two ROIs in left and right hemispheres: supramarginal gyrus (SMG), and the pars opercularis and triangularis of the inferior frontal gyrus (IFG), respectively. **B.** The time course of the *t*-value envelope, with the standard error of the mean ( $\pm 1$  SEM), obtained at representative voxels in each SNR condition (red color: +3 dB SNR, blue color: -3 dB SNR). An asterisk shows the timing of significant difference between +3 and -3 dB SNR conditions (paired *t*-test, FDR adjusted  $p < 0.05$ ). **C.** Whole brain maps showing statistical contrasts (*t*-values obtained from paired *t*-tests between the two SNR conditions) of source activation at each voxel, only displaying those with  $p$ -value less than 0.05, at the timepoint that shows significant differences over the broadest area in the ROIs within the time range described above.

353 To more precisely timelock these neural events to the stimulus, the webMAUS (Kisler et  
354 al., 2017) was used to identify the starting location of second and third phonemes in each of the  
355 100 stimuli. A histogram of these acoustic time points is shown in **Figure 4A**. **Figure 4B** shows  
356 the timing of SMG and IFG activity relative to the distribution of phoneme onsets in the target  
357 word stimuli. This confirms that the early SMG activation occurs within the timecourse of target  
358 words before the final phoneme is presented; the late IFG activation occurs after all words are  
359 presented.

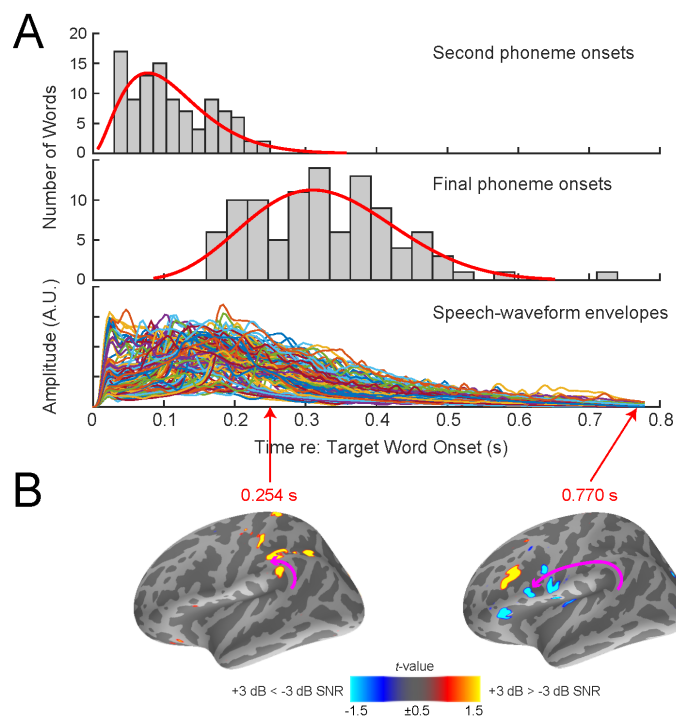

**Figure 4.** Timings of significant cortical activity relative to distributions of phonological events. **A.** Top and second panel show a histogram of the onsets of second and final phoneme of each stimulus. The third panel shows superimposed temporal envelopes extracted from waveforms of the 100 words. **B.** The whole brain maps at the bottom are from **Figure 3C** that shows statistical contrasts of source activation at the timepoints that show significant differences between the two SNR conditions. Purple curves on the cortical maps represent the conceptual illustration of ascending information flow through the dorsal pathway.

360

361 **External (acoustic) SNR effects on timepoints and regions of interest based on**

362 **microstate analysis**

363 To further assess temporal dynamics of neural activity during SiN perception in a data-  
364 driven way, and to cross-validate our ROI-based analyses, we performed microstate analysis  
365 (Lehmann, 1989b, a; Wackermann et al., 1993). Microstate analysis clusters time series of ERP  
366 data into multiple different brief brain states, which may indicate different stages of the  
367 information processing (Lehmann, 1989b). Four microstate maps were identified. (**Figure 5C**).  
368 The grand mean ERP at each timepoint was assigned to one of the microstate clusters, and  
369 GFP was calculated at those timepoints (**Figure 5B, C**).

370 Calculation of the relative area of GFP revealed that microstates 1 and 2 explained the  
371 largest variance in sensor-space ERPs over time in low SNR (area = 37%) and high SNR (area  
372 = 37%) condition, respectively. The timing, suggested by maximum GFP and the maximum  
373 deflection of ERPs at frontal-central electrodes among the timepoints assigned to microstate 1,  
374 was 0.668 seconds after word onset for the low SNR condition. The timing for microstate 2 was  
375 0.320 seconds after word onset for the high SNR condition.

376 We next conducted a whole-brain source analysis at the timepoint assigned to  
377 microstate 1 using one-sample t-tests against 0. This revealed increased activity in left  
378 hemisphere IFG activation for the low SNR condition (**Figure 5D**). The same analysis at the  
379 timepoint assigned to microstate 2 showed increased activity in the left hemisphere SMG for the  
380 high SNR condition (**Figure 5D**). These results from microstate analysis are consistent with the  
381 results of ROI-based analysis (illustrated in **Figure 3**) regarding timings and regions of neural  
382 activation.

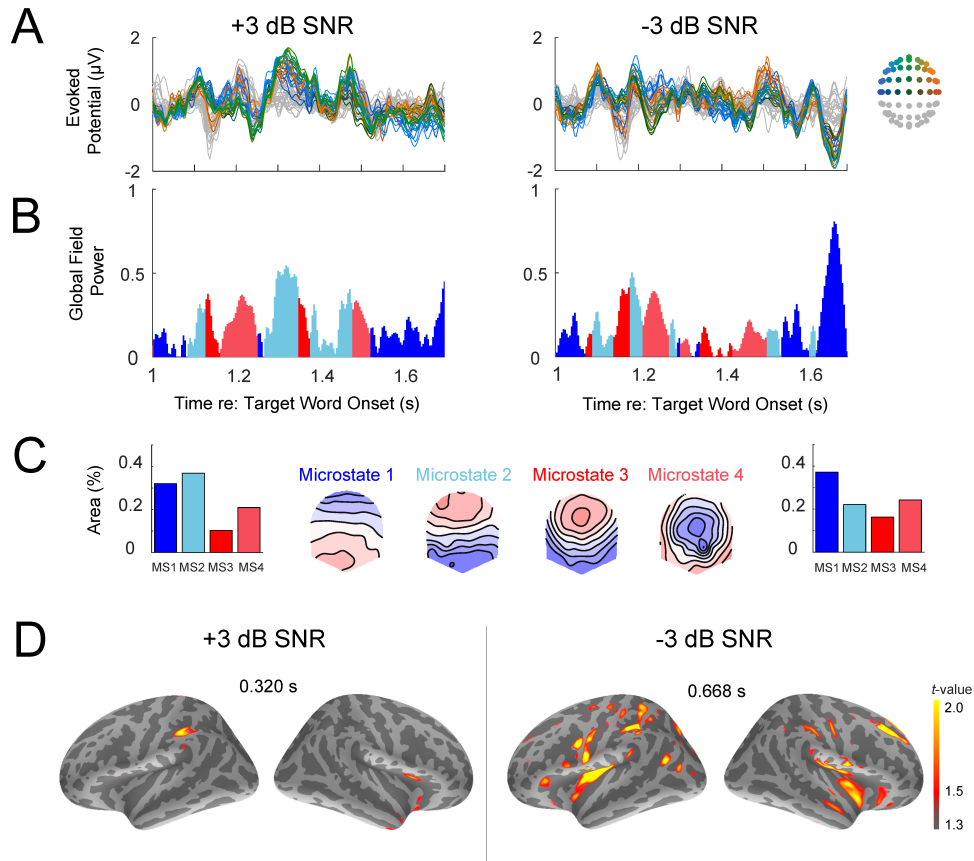

**Figure 5.** Microstate analysis. **A.** Evoked responses over time after the word onset for +3 and -3 dB SNR condition. Each color represents ERPs from a different channel of interest. **B.** Global field power (GFP) is calculated at each timepoint that is assigned to one of the microstate clusters. **C.** Four microstate cluster maps. Dark blue, light blue, red, and dark pink colors represent microstates 1, 2, 3, and 4, respectively. The relative area of GFP is calculated and reveals the highest value for the microstate 1 and 2 for -3 and +3 dB SNR condition, respectively. **D.** Whole brain maps obtained at the times assigned to microstates 1 and 2, that show maximum GFP and the maximum peak of ERPs at the frontal-central electrodes.

383

### 384 *Individual differences in internal SNR predict SiN performance*

385 For visualization purposes, we identified good and poor performers by conducting a  
386 median split based on their performance in the task. **Figure 6A** shows GFP of the grand mean  
387 ERPs for good and poor performance and topographies obtained at two timepoints identified by  
388 microstate maps in the low SNR condition: 1) 220 ms after the noise onset, corresponding to the  
389 auditory P2 to the noise; and 2) 240 ms after target word onset, corresponding to the AC-driven

390 N1 response. The word-evoked N1 was chosen as the first clearly AC-driven response to the  
391 word onset as evidenced by its assignment to microstate 4 in the previous analysis, while the  
392 timing of the noise-evoked P2 was suggested by microstate 3. Despite the same noise level for  
393 these two groups of subjects, good performers exhibited less AC response to the background  
394 noise, and greater AC response to the target word at central channels including Cz. This  
395 validates that each component of the internal SNR measure seems to contribute separately to  
396 SiN performance.

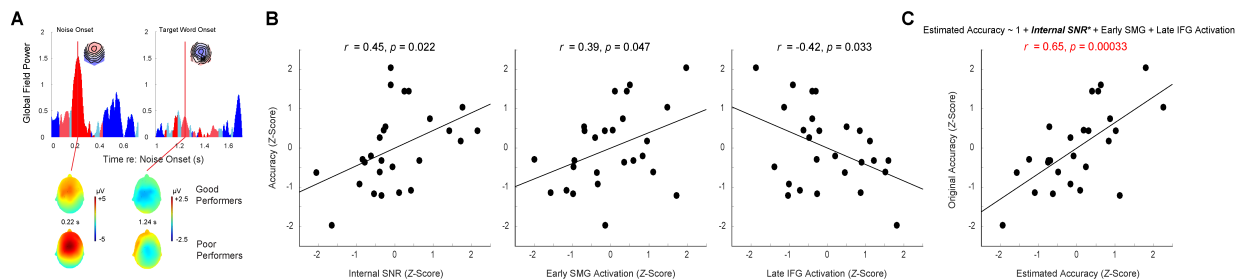

**Figure 6.** Individual differences in speech-in-noise processing. **A.** Global field power of the grand mean evoked potentials after the noise onset and after the target word onset, separately in the low SNR condition. Scalp topographies were examined at the timepoints, suggested by microstate analysis from **Figure 5**, and compared between good and poor performers, as determined by the median split. **B.** A series of scatter plots showing Pearson correlation coefficients among internal SNR, early SMG, late IFG activation, and behavioral accuracy. **C.** A scatter plot showing the regression coefficients from a linear regression model where behavioral accuracy is the dependent variable while internal SNR, early SMG, late IFG activation are the predictor variables. \*The linear model significantly predicts behavioral accuracy while internal SNR is the only significant predictor.

397 To address our primary research question, we evaluated the simultaneous contribution  
398 of primary auditory pathways and frontal compensatory processes. For this, we computed  
399 internal SNR as the amplitude ratio of the noise and target related cortical evoked responses  
400 (e.g., **Figure 6A**), expecting to quantify an individual's speech unmasking ability. We also  
401 computed the mean activity in SMG and IFG separately averaged over 150 to 350 ms (the early  
402 component), and 500 to 800 ms (late).

403 **Figure 6B** shows correlations among internal SNR, SMG/IFG source activation, and SiN  
404 performance (accuracy) in the low SNR condition, that are obtained from 26 leave-one-out  
405 grand averages using jackknifing approach (Luck, 2014; Stahl & Gibbons, 2004). Greater

406 internal SNR predicted better performance ( $R = 0.45$ ,  $p = 0.022$ ). Stronger early SMG activation  
407 also predicted better performance ( $R = 0.39$ ,  $p = 0.047$ ). However, greater late IFG activity  
408 predicted poorer performance ( $R = -0.42$ ,  $p = 0.033$ ). This suggests that both internal SNR and  
409 SMG activation are positively related to SiN performance, while IFG activation has negative  
410 relation to the performance.

411 To test their joint contributions, we conducted a linear regression in which internal SNR,  
412 SMG, IFG activation were simultaneously related to SiN performance (**Figure 6C**). As a whole,  
413 these factors accounted for a large proportion of the variance ( $R = 0.65$ ,  $p = 0.00033$ ). However,  
414 among these three factors, internal SNR was the only significant predictor ( $t = 2.25$ ,  $df = 22$ ,  $p =$   
415  $0.035$ ), whereas SMG ( $t = 1.80$ ,  $df = 22$ ,  $p > 0.05$ ) and IFG activation ( $t = -2.03$ ,  $df = 22$ ,  $p >$   
416  $0.05$ ) did not significantly contribute in the prediction SiN performance. This suggests that  
417 internal SNR (representing the contribution of lower level signal analysis) uniquely predicts  
418 variation in accuracy.

419

420

## Discussion

421 We found SNR effects on timing and location of cortical activity for a speech-in-noise  
422 recognition task. In a relatively easy SNR condition (in which subjects achieved ~80%  
423 accuracy), left SMG showed a relatively early evoked response (~250 ms after target word  
424 onset). In contrast, a challenging SNR (~68% accuracy) elicited the late response in left IFG  
425 (~700 ms after target word onset). Within the same “external” SNR condition, individual  
426 differences in such SMG and IFG responses predicted SiN performance; good performers  
427 showed stronger early SMG response while poor performers showed stronger late IFG activity.  
428 Individual differences in the ratio of noise- to target word-evoked cortical responses—the  
429 “internal SNR,”—also predicted SiN performance; subjects with lower internal SNR exhibited  
430 poorer accuracy. Importantly, both SMG and IFG responses did not contribute to the prediction  
431 of SiN performance when internal SNR was added to the linear regression model. These results

432 from correlational analyses could be explained by auditory scene analysis mechanisms for  
433 target unmasking and by temporal cortical processes for speech perception. A poorer ability to  
434 unmasking target speech from background noise may lead to increased frontal lobe processing  
435 that is employed when lower-level auditory pathways are unable to secure favorable speech  
436 quality due to background noise.

437

#### 438 ***Internal SNR: A measure of pre-speech processing for speech unmasking***

439 Pre-speech time cortical activity for speech unmasking should be localized to the  
440 primary and secondary AC, appearing as enhanced neural representation of the target sound  
441 (the speech) and suppressed neural representation of ignored stimuli (the noise). This is  
442 consistent with work suggesting that the auditory N1 (the numerator of the measure) can be  
443 localized to AC and the planum temporale (Schneider et al., 2002).

444 Such responses could reflect auditory selective attention, which shows a similar pattern  
445 in previous studies (Hillyard et al., 1973; Hillyard et al., 1998; Mesgarani and Chang, 2012). In  
446 the present study, good performers showed significantly weaker noise-evoked AC response,  
447 compared with poor performers, approximately 200 ms after the noise onset (**Figure 6A**).  
448 Decreased AC response to background noise in good performers is compatible with the  
449 presence of a sensory gain control mechanism (Hillyard et al., 1998). The variation in the  
450 sensory gain control may originate from multiple factors. It may reflect the acuity of encoding  
451 spectro-temporal acoustic cues from speech and noise or grouping of such acoustic cues for  
452 auditory object formation. It may also reflect endogenous mechanisms for active suppression of  
453 background sounds along with neural enhancement of foreground sounds (Shinn-Cunningham  
454 and Best, 2008).

455 Our goal was not to disentangle the sources of variation in sensory gain control but  
456 rather to quantify the effectiveness of sensory gain control by internal SNR and test how it  
457 predicts later speech processes and behavioral accuracy. In this regard, we found a significant

458 correlation between accuracy and the relative amplitude word- and noise-evoked potentials.  
459 This demonstrates that individuals have a differential ability to suppress the noise effectively via  
460 early auditory processes (indexed by internal SNR). The first-order correlations between IFG  
461 and SMG activation and behavioral performance were compatible with the effect of SNR on  
462 ERPs: Good performers had stronger SMG activation (as in the high SNR condition), while poor  
463 performers had stronger IFG activation (as the low SNR condition). However, the amplitude of  
464 SMG and IFG response did not uniquely contribute to accuracy when internal SNR was added  
465 to the model. This indicates that changes in SMG or IFG activity are the outcome of pre-speech  
466 sensory gain control processing, rather than an independent causal factor predicting speech  
467 perception performance.

468         This result conflicts with some findings from earlier studies but also clarifies their  
469 findings. For example, Wong et al. (2009) did not find a relationship between SiN performance  
470 and AC or auditory related cortex. However, this study used fMRI, which may have missed the  
471 contribution of much shorter-lived bottom-up processes (Parbery-Clark et al., 2009). Like us,  
472 they did find correlations with activity in the IFG (and also the precentral gyrus a second dorsal  
473 route site). However, this study included both younger and older adults (who showed  
474 differences in cortical networks). Thus, some of these correlations may have been driven by age  
475 differences. Also, it is unclear whether these differences in cortical activity are necessary for  
476 successful SiN understanding (or at least helpful), as such differences could also reflect  
477 processes like increased effort (consistent with the view that IFG may be a domain-general  
478 control process) (Fedorenko et al., 2013), error monitoring, or even just increased uncertainty.  
479 Such processes may be engaged by noise without necessarily playing a causal role in  
480 improving perception.

481         Similarly, Bidelman and Howell (2016) related both AC and dorsal route activity to  
482 performance. They found no contribution of AC, but a correlation between speech performance  
483 and early (~115 ms) activity in the IFG. However, their measure of AC activity represented the



484 response to both the speech and noise, not the ability of AC to pull speech from the noise.  
485 Moreover, speech perception accuracy was assessed in an offline task. As a result, the cortical  
486 activity measures did not reflect cortical processes leading up to accurate (or inaccurate  
487 response); thus, these correlations may reflect broader individual differences, rather than a  
488 causal chain leading to accurate SiN processing.

489

#### 490 ***SNR effect on timing and location of cortical activity***

491 Previous studies have suggested that spoken-word recognition occurs via a process of  
492 dynamic lexical competition as speech unfolds over time. For many words, this competition  
493 begins to resolve (e.g., the target separates from competitors) around 300 ms after word onset  
494 (Huettig and Altmann, 2005; Farris-Trimble and McMurray, 2013). In significantly challenging  
495 conditions (high noise) however, lexical processing can be delayed about 250 ms until most of  
496 the word has been heard (Farris-Trimble et al., 2014; McMurray et al., 2017), which may  
497 minimize competition. Based on the timing predicted by these studies, we expected early SMG  
498 processing in the high SNR condition, and late IFG processing in the low SNR condition.

499 Our secondary analysis, a data-driven approach based on spatiotemporal clustering  
500 analysis of ERPs (microstate analysis), supports the conclusion from the ROI-based analysis.  
501 As microstates 1 and 2 explained the greatest amount of the signal's variance in the low and the  
502 high SNR condition, respectively, we focused on the highest GFP peak timepoints, within  
503 corresponding microstates for each SNR condition. Whole brain maps obtained from those  
504 timepoints were supportive of the ROI analysis: in the high SNR condition, SMG was strongly  
505 activated in the left hemisphere, while left IFG and bilateral Heschl's gyrus (HG) were activated  
506 in the low SNR condition.

507 Increased SMG activity between the second and the third phonemes (see **Figure 4**) in  
508 the high SNR condition may indicate a neural substrate of immediate lexical access (Farris-  
509 Trimble et al., 2014; McMurray et al., 2017), consistent with Gow (2012). This immediacy was

510 observed when speech sounds were relatively clean (high SNR), and it does not appear in  
511 previous EEG studies using non-word synthesized phonemes (Bidelman and Dexter, 2015;  
512 Bidelman and Howell, 2016). However, we note that Bidelman and Howell used a single non-  
513 word stimulus (a vowel-consonant-vowel) that would not be expected to engage lexical  
514 processing. Bidelman and Howell's results also demonstrated an early activity (~115 ms) in IFG  
515 with a clearly intelligible VCV phoneme. This was not observed in our study. However, because  
516 we used naturally spoken CVC words, we can limit the interpretation of the late IFG activity to  
517 the decision-making process in which listeners are trying to clean up the results of lexical  
518 competition in SMG.

519         The idea that greater IFG activity is linked with poorer SiN recognition performance  
520 seems to be inconsistent with some fMRI studies that showed the positive correlation between  
521 the IFG activity and speech recognition performance (Zekveld et al., 2006; Wong et al., 2009;  
522 Vaden et al., 2015; Du et al., 2016). This may stem from the difference between fMRI and EEG  
523 in temporal resolution and in sensitivity to either neural metabolic activity or the equivalent  
524 current dipoles (Bridwell et al., 2013). In the present study, we exhibited event-related potentials  
525 at a specific latency of ~700 ms after target word onset, i.e., ~200 ms after target word "offset."  
526 Previous fMRI studies might have demonstrated IFG activity at different latencies or  
527 accumulated BOLD signal that is not time-locked to a specific sensory event. Alternatively, this  
528 difference between fMRI and the current EEG results might be due to an error in the estimation  
529 of our source location. However, the fact that both of our approaches – an ROI-based approach  
530 and a data-driven approach without a space constraint – resulted in exhibiting the same IFG  
531 activity with a similar latency might make our results more reliable.

532         So, what is IFG contributing to the process? It is unknown whether these processes are  
533 due to active compensation for the noise or increased effort (both of which may help) or are a  
534 simply marker of increased response uncertainty. Our correlational analyses do not suggest a  
535 causal role for frontal activity in predicting an individual's accuracy. The first order correlation

536 was negative – more frontal activity was linked to *less* overall accuracy. More importantly, this  
537 correlation was not significant when internal SNR was added to the model suggesting IFG  
538 activity does not offer a unique contribution to accuracy. Rather it may simply reflect the clarity  
539 of the signal offered by the earlier auditory processes that deal with noise. That is, if we view  
540 IFG as primarily serving a decision-making role in this task when dorsal route areas do not  
541 output clear representations of the signal, IFG must work harder to resolve on a decision. It may  
542 be then that activity in frontal areas is not causally necessary for good SiN performance, but  
543 rather reflects the additional response uncertainty created by noisy listening situations. This  
544 challenges accounts like Du et al. (2016) that argue for a causal role of dorsal route processing  
545 in SiN understanding.

546

#### 547 ***Methodological advances and justifications for source time course analysis***

548 Our approach to identifying a single voxel within an ROI deserves a particular  
549 discussion. Identification of the representative voxel of an ROI is a problem common to EEG  
550 source analysis, fMRI, and other functional brain imaging studies. Many relevant neuroimaging  
551 analysis approaches have been described, including univariate, multivariate, and machine  
552 learning; however, most of these are intended for the identification of regions of interest or  
553 functional connections from a whole brain map. Drawbacks of this type of whole-brain analysis  
554 include the need for strict multiple comparisons correction and, therefore, decreased statistical  
555 power. Using strong a priori hypotheses to generate regions of interest allowed us to circumvent  
556 these issues, but still requires identification of representative voxels within our regions of  
557 interest. Favored approaches generally require identification of peak activity within an ROI  
558 (Tong et al., 2016). However, to avoid the assumption that choosing peak activity implies, we  
559 opted instead to choose the voxel that has the maximum average correlation to every other  
560 voxel within the ROI. In the present study, we chose not to constrain the location of the voxel of  
561 interest within an ROI for each condition. Because our anatomic resolution is unlikely to be at

562 the voxel level, we elected to choose a different representative voxel for each condition,  
563 unconstrained by the location of the representative voxel from other conditions.

564

### 565 **Conclusion**

566 We found that clean, intelligible speech elicits early processing at SMG, while sensory  
567 degradation results in late processing at IFG for less intelligible speech. Better speech  
568 unmasking in good performers modulated the ratio of cortical evoked responses to the  
569 background noise and target sound, which effectively changed SNR internally, resulting in  
570 facilitated lexical/phonological processing through SMG. These findings may collectively form a  
571 neural substrate of individual differences in speech-in-noise understanding ability. Crucially,  
572 however, only neural representation of SNR uniquely predicted variation in performance,  
573 suggesting that individual differences in SiN comprehension are largely a matter of primary  
574 processes that extract the signal from noise rather than later compensatory ones.

575

## 576 References

- 577 Allopenna PD, Magnuson JS, Tanenhaus MK (1998) Tracking the Time Course of Spoken Word  
578 Recognition Using Eye Movements: Evidence for Continuous Mapping Models. *Journal*  
579 *of memory and language* 38:419-439.
- 580 Ben-David BM, Chambers CG, Daneman M, Pichora-Fuller MK, Reingold EM, Schneider BA  
581 (2011) Effects of aging and noise on real-time spoken word recognition: evidence from  
582 eye movements. *Journal of speech, language, and hearing research : JSLHR* 54:243-  
583 262.
- 584 Bidelman GM, Dexter L (2015) Bilinguals at the "cocktail party": dissociable neural activity in  
585 auditory-linguistic brain regions reveals neurobiological basis for nonnative listeners'  
586 speech-in-noise recognition deficits. *Brain Lang* 143:32-41.
- 587 Bidelman GM, Howell M (2016) Functional changes in inter- and intra-hemispheric cortical  
588 processing underlying degraded speech perception. *Neuroimage* 124:581-590.
- 589 Binder JR, Liebenthal E, Possing ET, Medler DA, Ward BD (2004) Neural correlates of sensory  
590 and decision processes in auditory object identification. *Nat Neurosci* 7:295-301.
- 591 Brainard DH (1997) The Psychophysics Toolbox. *Spat Vis* 10:433-436.
- 592 Bregman AS (1999) Auditory scene analysis : the perceptual organization of sound. Cambridge,  
593 Mass.: MIT Press.
- 594 Bridwell DA, Wu L, Eichele T, Calhoun VD (2013) The spatospectral characterization of brain  
595 networks: fusing concurrent EEG spectra and fMRI maps. *Neuroimage* 69:101-111.
- 596 Brouwer S, Bradlow AR (2016) The Temporal Dynamics of Spoken Word Recognition in  
597 Adverse Listening Conditions. *Journal of psycholinguistic research* 45:1151-1160.
- 598 Dahan D, Gareth Gaskell M (2007) The temporal dynamics of ambiguity resolution: Evidence  
599 from spoken-word recognition. *Journal of memory and language* 57:483-501.
- 600 Dale AM, Liu AK, Fischl BR, Buckner RL, Belliveau JW, Lewine JD, Halgren E (2000) Dynamic  
601 statistical parametric mapping: combining fMRI and MEG for high-resolution imaging of  
602 cortical activity. *Neuron* 26:55-67.
- 603 Du Y, Buchsbaum BR, Grady CL, Alain C (2014) Noise differentially impacts phoneme  
604 representations in the auditory and speech motor systems. *Proc Natl Acad Sci U S A*  
605 111:7126-7131.
- 606 Du Y, Buchsbaum BR, Grady CL, Alain C (2016) Increased activity in frontal motor cortex  
607 compensates impaired speech perception in older adults. *Nat Commun* 7:12241.
- 608 Farris-Trimble A, McMurray B (2013) Test-retest reliability of eye tracking in the visual world  
609 paradigm for the study of real-time spoken word recognition. *Journal of Speech*  
610 *Language and Hearing Research* 56:1328-1345.
- 611 Farris-Trimble A, McMurray B, Cigrand N, Tomblin JB (2014) The process of spoken word  
612 recognition in the face of signal degradation. *Journal of Experimental Psychology:*  
613 *Human Perception and Performance* *Journal of Experimental Psychology: Human*  
614 *Perception and Performance* 40:308-327.
- 615 Fedorenko E, Duncan J, Kanwisher N (2013) Broad domain generality in focal regions of frontal  
616 and parietal cortex. *Proceedings of the National Academy of Sciences Proceedings of*  
617 *the National Academy of Sciences* 110:16616-16621.
- 618 Frey JN, Mainy N, Lachaux JP, Muller N, Bertrand O, Weisz N (2014) Selective Modulation of  
619 Auditory Cortical Alpha Activity in an Audiovisual Spatial Attention Task. *JOURNAL OF*  
620 *NEUROSCIENCE* 34:6634.
- 621 Friston K, Harrison L, Daunizeau J, Kiebel S, Phillips C, Trujillo-Barreto N, Henson R, Flandin  
622 G, Mattout J (2008) Multiple sparse priors for the M/EEG inverse problem. *Neuroimage*  
623 39:1104-1120.
- 624 Gagne JP, Besser J, Lemke U (2017) Behavioral Assessment of Listening Effort Using a Dual-  
625 Task Paradigm. *Trends Hear* 21:1-25.

- 626 Goldberg HR, Choi I, Varghese LA, Bharadwaj H, Shinn-Cunningham BG (2014) Auditory  
627 attention in a dynamic scene: Behavioral and electrophysiological correlates. *The*  
628 *Journal of the Acoustical Society of America* *The Journal of the Acoustical Society of*  
629 *America* 135:2415.
- 630 Gow DW, Jr. (2012) The cortical organization of lexical knowledge: a dual lexicon model of  
631 spoken language processing. *Brain Lang* 121:273-288.
- 632 Gramfort A, Luessi M, Larson E, Engemann DA, Strohmeier D, Brodbeck C, Parkkonen L,  
633 Hamalainen MS (2014) MNE software for processing MEG and EEG data. *Neuroimage*  
634 86:446-460.
- 635 Gramfort A, Luessi M, Larson E, Engemann DA, Strohmeier D, Brodbeck C, Goj R, Jas M,  
636 Brooks T, Parkkonen L, Hamalainen M (2013) MEG and EEG data analysis with MNE-  
637 Python. *Front Neurosci* 7:267.
- 638 Hämäläinen MS, Sarvas, J. (1989) Realistic conductivity geometry model of the human head for  
639 interpretation of neuromagnetic data. *IEEE Trans Biomed Eng* 36:165-171.
- 640 Harris RW, Swenson DW (1990) Effects of reverberation and noise on speech recognition by  
641 adults with various amounts of sensorineural hearing impairment. *Audiology : official*  
642 *organ of the International Society of Audiology* 29:314-321.
- 643 Hickok G, Poeppel D (2007) The cortical organization of speech processing. *Nat Rev Neurosci*  
644 8:393-402.
- 645 Hillyard SA, Vogel EK, Luck SJ (1998) Sensory gain control (amplification) as a mechanism of  
646 selective attention: electrophysiological and neuroimaging evidence. *Philosophical*  
647 *transactions of the Royal Society of London Series B, Biological sciences* 353:1257-  
648 1270.
- 649 Hillyard SA, Hink RF, Schwent VL, Picton TW (1973) Electrical signs of selective attention in the  
650 human brain. *Science* 182:177-180.
- 651 Huettig F, Altmann GT (2005) Word meaning and the control of eye fixation: semantic  
652 competitor effects and the visual world paradigm. *Cognition* 96:B23-32.
- 653 Kisler T, Reichel UD, Sciel F (2017) Multilingual processing of speech via web services.  
654 *Computer Speech & Language* 45:326-347.
- 655 Koenig T, Kottlow M, Stein M, Melie-Garcia L (2011) Ragu: a free tool for the analysis of EEG  
656 and MEG event-related scalp field data using global randomization statistics. *Comput*  
657 *Intell Neurosci* 2011:1-14.
- 658 Koenig T, Stein M, Grieder M, Kottlow M (2014) A tutorial on data-driven methods for  
659 statistically assessing ERP topographies. *Brain Topogr* 27:72-83.
- 660 Lange K (2009) Brain correlates of early auditory processing are attenuated by expectations for  
661 time and pitch. *Brain and cognition* 69:127.
- 662 Lee AKC, Rajaram S, Xia J, Bharadwaj H, Larson E, Hämäläinen MS, Shinn-Cunningham BG  
663 (2013) Auditory Selective Attention Reveals Preparatory Activity in Different Cortical  
664 Regions for Selection Based on Source Location and Source Pitch. *Front Neurosci*  
665 *Frontiers in Neuroscience* 6.
- 666 Lehmann D (1989a) Microstates of the Brain in EEG and ERP Mapping Studies.72-83.
- 667 Lehmann D (1989b) From Mapping to the Analysis and Interpretation of EEG/EP Maps.53-75.
- 668 Liberman MC, Epstein MJ, Cleveland SS, Wang H, Maison SF (2016) Toward a differential  
669 diagnosis of hidden hearing loss in humans. *PLoS One* 11:1-16.
- 670 Liebenthal E, Sabri M, Beardsley SA, Mangalathu-Arumana J, Desai A (2013) Neural dynamics  
671 of phonological processing in the dorsal auditory stream. *J Neurosci* 33:15414-15424.
- 672 Luck SJ (2014) An introduction to the event-related potential technique, Second edition. Edition.  
673 Cambridge, Massachusetts: The MIT Press.
- 674 Magnuson JS, Dixon JA, Tanenhaus MK, Aslin RN (2007) The dynamics of lexical competition  
675 during spoken word recognition. *Cognitive science* 31:133-156.

- 676 McMurray B, Farris-Trimble A, Rigler H (2017) Waiting for lexical access: Cochlear implants or  
677 severely degraded input lead listeners to process speech less incrementally. *Cognition*  
678 169:147-164.
- 679 McQueen JM, Huettig F (2012) Changing only the probability that spoken words will be distorted  
680 changes how they are recognized. *The Journal of the Acoustical Society of America* The  
681 *Journal of the Acoustical Society of America* 131:509-517.
- 682 Mesgarani N, Chang EF (2012) Selective cortical representation of attended speaker in multi-  
683 talker speech perception. *Nature* 485:233-236.
- 684 Myers EB, Blumstein SE, Walsh E, Eliassen J (2009) Inferior Frontal Regions Underlie the  
685 Perception of Phonetic Category Invariance. *PSCI Psychological Science* 20:895-903.
- 686 Nabelek AK (1988) Identification of vowels in quiet, noise, and reverberation: relationships with  
687 age and hearing loss. *The Journal of the Acoustical Society of America* 84:476-484.
- 688 Ohlenforst B, Zekveld AA, Lunner T, Wendt D, Naylor G, Wang Y, Versfeld NJ, Kramer SE  
689 (2017) Impact of stimulus-related factors and hearing impairment on listening effort as  
690 indicated by pupil dilation. *Hear Res* 351:68-79.
- 691 Ott CG, Langer N, Oechslin MS, Meyer M, Jancke L (2011) Processing of voiced and unvoiced  
692 acoustic stimuli in musicians. *Front Psychol* 2:195.
- 693 Owens E, Schubert ED (1977) Development of the California Consonant Test. *J Speech Lang*  
694 *Hear Res* 20:463-474.
- 695 Parbery-Clark A, Skoe E, Kraus N (2009) Musical experience limits the degradative effects of  
696 background noise on the neural processing of sound. *J Neurosci* 29:14100-14107.
- 697 Pelli DG (1997) The VideoToolbox software for visual psychophysics: transforming numbers into  
698 movies. *Spat Vis* 10:437-442.
- 699 Schiller B, Gianotti LR, Baumgartner T, Nash K, Koenig T, Knoch D (2016) Clocking the social  
700 mind by identifying mental processes in the IAT with electrical neuroimaging. *Proc Natl*  
701 *Acad Sci U S A* 113:2786-2791.
- 702 Schneider P, Scherg M, Dosch HG, Specht HJ, Gutschalk A, Rupp A (2002) Morphology of  
703 Heschl's gyrus reflects enhanced activation in the auditory cortex of musicians. *Nature*  
704 *neuroscience* 5:688-694.
- 705 Scott SK, Johnsrude IS (2003) The neuroanatomical and functional organization of speech  
706 perception. *Trends Neurosci* 26:100-107.
- 707 Shinn-Cunningham BG, Best V (2008) Selective attention in normal and impaired hearing.  
708 *Trends Amplif* 12:283-299.
- 709 Stahl J, Gibbons H (2004) The application of jackknife-based onset detection of lateralized  
710 readiness potential in correlative approaches. *Psychophysiology* 41:845-860.
- 711 Storey JD (2002) A direct approach to false discovery rates. *JOURNAL- ROYAL STATISTICAL*  
712 *SOCIETY SERIES B STATISTICAL METHODOLOGY* 64:479-498.
- 713 Tong Y, Chen Q, Nichols TE, Rasetti R, Callicott JH, Berman KF, Weinberger DR, Mattay VS  
714 (2016) Seeking optimal region-of-interest (ROI) single-value summary measures for  
715 fMRI studies in imaging genetics. *PLoS One* 11:1-20.
- 716 Vaden KI, Jr., Kuchinsky SE, Ahlstrom JB, Dubno JR, Eckert MA (2015) Cortical activity  
717 predicts which older adults recognize speech in noise and when. *J Neurosci* 35:3929-  
718 3937.
- 719 Wackermann J, Lehmann D, Michel CM, Strik WK (1993) Adaptive segmentation of  
720 spontaneous EEG map series into spatially defined microstates. *INTPSY*  
721 *International Journal of Psychophysiology* 14:269-283.
- 722 Wong PC, Uppunda AK, Parrish TB, Dhar S (2008) Cortical mechanisms of speech perception  
723 in noise. *Journal of speech, language, and hearing research : JSLHR* 51:1026-1041.
- 724 Wong PC, Jin JX, Gunasekera GM, Abel R, Lee ER, Dhar S (2009) Aging and cortical  
725 mechanisms of speech perception in noise. *Neuropsychologia* 47:693-703.

726 Zekveld AA, Heslenfeld DJ, Festen JM, Schoonhoven R (2006) Top-down and bottom-up  
727 processes in speech comprehension. *Neuroimage* 32:1826-1836.  
728  
729



## 730 **Figure Legends**

731 **Figure 1.** Trial and stimulus structure. Every trial starts with the cue phrase “check the word.” A  
732 target word starts 1 second after the noise onset. Four choices are given after the word ends;  
733 subjects select the correct answer with a keypad. No feedback is given. The noise level is  
734 manipulated to create high (+3 dB) and low (-3 dB) SNR conditions. Subjects complete 50 trials  
735 for each condition.  
736

737 **Figure 2.** Behavioral results. **A.** Summary of behavioral performance for the two conditions (+3  
738 and -3 dB SNR). Boxes denote the 25th – 75th percentile range; the horizontal bars in the  
739 center denote the median; the ranges are indicated by vertical dashed lines. Solid lines connect  
740 points for the same subject in different conditions. **B.** Average accuracy as a function of reaction  
741 time in +3 dB SNR condition. **C.** Average accuracy and reaction time in -3 dB SNR condition.  
742

743 **Figure 3.** Region-of-interest (ROI) based source analysis. **A.** Cortical labels for two ROIs in left  
744 and right hemispheres: supramarginal gyrus (SMG), and the pars opercularis and triangularis of  
745 the inferior frontal gyrus (IFG), respectively. **B.** The time course of the t-value envelope, with the  
746 standard error of the mean ( $\pm 1$  SEM), obtained at representative voxels in each SNR condition  
747 (red color: +3 dB SNR, blue color: -3 dB SNR). An asterisk shows the timing of significant  
748 difference between +3 and -3 dB SNR conditions (paired t-test, FDR adjusted  $p < 0.05$ ). **C.**  
749 Whole brain maps showing statistical contrasts (t-values obtained from paired t-tests between  
750 the two SNR conditions) of source activation at each voxel, only displaying those with p-value  
751 less than 0.05, at the timepoint that shows significant differences over the broadest area in the  
752 ROIs within the time range described above.  
753

754 **Figure 4.** Timings of significant cortical activity relative to distributions of phonological events.  
755 **A.** Top and second panel show a histogram of the onsets of second and final phoneme of each  
756 stimulus. The third panel shows superimposed temporal envelopes extracted from waveforms of  
757 the 100 words. **B.** The whole brain maps at the bottom are from **Figure 3C** that shows statistical  
758 contrasts of source activation at the timepoints that show significant differences between the  
759 two SNR conditions. Purple curves on the cortical maps represent the conceptual illustration of  
760 ascending information flow through the dorsal pathway.  
761

762 **Figure 5.** Microstate analysis. **A.** Evoked responses over time after the word onset for +3 and -3  
763 dB SNR condition. Each color represents ERPs from a different channel of interest. **B.** Global  
764 field power (GFP) is calculated at each timepoint that is assigned to one of the microstate  
765 clusters. **C.** Four microstate cluster maps. Dark blue, light blue, red, and dark pink colors  
766 represent microstates 1, 2, 3, and 4, respectively. The relative area of GFP is calculated and  
767 reveals the highest value for the microstate 1 and 2 for -3 and +3 dB SNR condition,  
768 respectively. **D.** Whole brain maps obtained at the times assigned to microstates 1 and 2, that  
769 show maximum GFP and the maximum peak of ERPs at the frontal-central electrodes.  
770

771 **Figure 6.** Individual differences in speech-in-noise processing. **A.** Global field power of the  
772 grand mean evoked potentials after the noise onset and after the target word onset, separately  
773 in the low SNR condition. Scalp topographies were examined at the timepoints, suggested by  
774 microstate analysis from **Figure 5**, and compared between good and poor performers, as

775 determined by the median split. **B.** A series of scatter plots showing Pearson correlation  
776 coefficients among internal SNR, early SMG, late IFG activation, and behavioral accuracy. **C.** A  
777 scatter plot showing the regression coefficients from a linear regression model where behavioral  
778 accuracy is the dependent variable while internal SNR, early SMG, late IFG activation are the  
779 predictor variables. \*The linear model significantly predicts behavioral accuracy while internal  
780 SNR is the only significant predictor.  
781

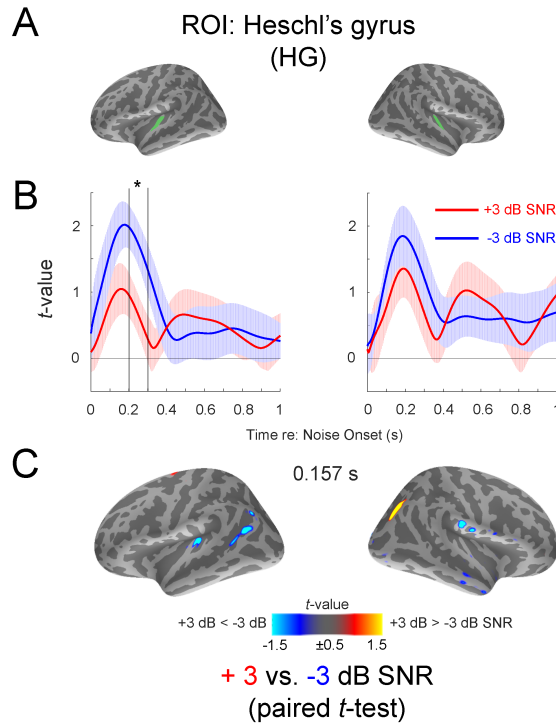

**Supplement Figure 1.** Region-of-interest (ROI) based source analysis. **A.** Cortical labels for Heschl's gyrus in left and right hemispheres. **B.** The time course of the  $t$ -value envelope, with the standard error of the mean ( $\pm 1$  SEM), obtained at representative voxels in each SNR condition (red color: +3 dB SNR, blue color: -3 dB SNR). An asterisk shows the timing of significant difference between +3 and -3 dB SNR conditions (paired  $t$ -test, FDR adjusted  $p < 0.05$ ). **C.** Whole brain maps showing statistical contrasts ( $t$ -values obtained from paired  $t$ -tests between the two SNR conditions) of source activation at each voxel, only displaying those with  $p$ -value less than 0.05.

782
